# Supplementary material for: Long-term cost-effectiveness of interventions for obesity: A mendelian randomisation study
Source: PLoS Med. 2021 Aug 27;18(8):e1003725. doi: 10.1371/journal.pmed.1003725 (PMC8437285; doi:10.1371/journal.pmed.1003725)
Supplement: S13 Table — (XLSX) [file pmed.1003725.s018.xlsx]

## Sheet: Sheet1
S13 Table: Results for Policy Analysis b: restricting volume promotions on high fat, salt and sugar products (total population)
Legend: Results for the cost effectiveness of restricting volume promotions on high fat, salt and sugar products (total population of 21,742,497 people aged 40 to 69 years in England and Wales) using Mendelian randomization and multivariable adjusted estimates (Policy Analysis b). The median and 95% CIs are estimated from 10,000 simulations. Net monetary benefit is the expected benefit of the int…
Outcome	Type	Median	Lower 95% CI	Upper 95% CI
QALYs per year	Main Analysis MR	20551.2	15334.8	25301.1
QALYs per year	Multivariable Adjusted	19208.2	17635.9	20622.5
Primary healthcare costs per year (£ millions)	Main Analysis MR	-64.0861	-81.5963	-48.1867
Primary healthcare costs per year (£ millions)	Multivariable Adjusted	-56.8979	-62.2195	-52.24
Secondary healthcare costs per year (£ millions)	Main Analysis MR	-72.8597	-98.3833	-49.4533
Secondary healthcare costs per year (£ millions)	Multivariable Adjusted	-56.2146	-64.1455	-48.8342
Total healthcare costs per year (£ millions)	Main Analysis MR	-136.764	-170.172	-106.323
Total healthcare costs per year (£ millions)	Multivariable Adjusted	-113.083	-123.38	-103.661
QALY-costs per year (£10k per QALY) (£ millions)	Main Analysis MR	-342.712	-414.435	-277.438
QALY-costs per year (£10k per QALY) (£ millions)	Multivariable Adjusted	-305.126	-326.699	-285.285
QALY-costs per year (£20k per QALY) (£ millions)	Main Analysis MR	-546.204	-670.549	-435.757
QALY-costs per year (£20k per QALY) (£ millions)	Multivariable Adjusted	-497.227	-533.969	-464.296
QALY-costs per year (£30k per QALY) (£ millions)	Main Analysis MR	-753.684	-929.892	-598.25
QALY-costs per year (£30k per QALY) (£ millions)	Multivariable Adjusted	-689.065	-740.777	-642.974
Net monetary benefit per year (£10k per QALY) (£ millions)	Main Analysis MR	342.712	277.438	414.435
Net monetary benefit per year (£10k per QALY) (£ millions)	Multivariable Adjusted	305.126	285.285	326.699
Net monetary benefit per year (£20k per QALY) (£ millions)	Main Analysis MR	546.204	435.757	670.549
Net monetary benefit per year (£20k per QALY) (£ millions)	Multivariable Adjusted	497.227	464.296	533.969
Net monetary benefit per year (£30k per QALY) (£ millions)	Main Analysis MR	753.684	598.25	929.892
Net monetary benefit per year (£30k per QALY) (£ millions)	Multivariable Adjusted	689.065	642.974	740.777
Net monetary benefit is the expected benefit of the intervention over 1 year, considering the effect of BMI on QALYs and costs, and the cost of the intervention (£0)
QALY-costs are a representation of the combined effect of a unit increase in BMI on both QALYs (at a specified value) and healthcare costs: QALY-costs = effect of BMI on total healthcare costs - effect of BMI on QALYs*value, where value = £10k, £20k or £30k
